# Supplementary material for: Alterations in the RTK/Ras/PI3K/AKT pathway serve as potential biomarkers for immunotherapy outcome of diffuse gliomas
Source: publisher site journal article supplement (doi:10.18632/aging.203102), 2021-06-08
Supplement: Supplementary file [file aging-v13i11-203102-supplementary-material-SD2.pdf]

## SUPPLEMENTARY TABLE

**Supplementary Table 1. Genes involved in oncogenic signaling pathways.**

| <b>Oncogenic signaling pathways</b> | <b>Genes</b>                                                                                   |
|-------------------------------------|------------------------------------------------------------------------------------------------|
| RTK/Ras/PI3K/AKT Signaling          | GFR ERBB2 PDGFRA MET KRAS NRAS HRAS NF1 SPRY2 FOXO1 FOXO3 AKT1<br>AKT2 AKT3 PIK3R1 PIK3CA PTEN |
| RB pathway                          | CDKN2A CDKN2B CDKN2C CDK4 CDK6 CCND2 RB1                                                       |
| TP53 pathway                        | CDKN2A MDM2 MDM4 TP53                                                                          |
