# Supplementary material for: Alterations in the RTK/Ras/PI3K/AKT pathway serve as potential biomarkers for immunotherapy outcome of diffuse gliomas
Source: Aging (Albany NY). 2021 Jun 8;13(11):15444–58. doi: 10.18632/aging.203102 (PMC8221357; doi:10.18632/aging.203102)
Supplement: Supplementary Table 2 [file aging-13-203102-s003.xlsx]

## Sheet: Sheet1
Supplementary Table 2. Significant regulated immune response gene.
GeneSymbol	regulated
SOX8	Down-Regulated
OPHN1	Down-Regulated
IFITM10	Down-Regulated
GNB3	Down-Regulated
RGS9	Down-Regulated
KCNIP3	Down-Regulated
SAMD11	Down-Regulated
STOX1	Down-Regulated
CCL4	Down-Regulated
VIPR2	Down-Regulated
REM1	Down-Regulated
GALR3	Down-Regulated
CDHR5	Down-Regulated
CNTN3	Down-Regulated
RSPO3	Down-Regulated
SLC25A48	Down-Regulated
HTR2C	Down-Regulated
KCNH5	Down-Regulated
SLC1A6	Down-Regulated
ADTRP	Down-Regulated
GREB1L	Down-Regulated
SSTR1	Down-Regulated
CPB1	Down-Regulated
BLK	Down-Regulated
SERPINB3	Down-Regulated
C14orf180	Down-Regulated
HNF4A	Down-Regulated
RBP3	Down-Regulated
CREB3L3	Down-Regulated
KCNJ13	Down-Regulated
SLCO1B1	Down-Regulated
CALML3	Down-Regulated
DEFB119	Down-Regulated
TEX19	Down-Regulated
FIGLA	Down-Regulated
FOXR2	Down-Regulated
CLPSL1	Down-Regulated
MS4A18	Down-Regulated
RD3L	Down-Regulated
AL356135.1	Down-Regulated
FABP7	Up-Regulated
BGN	Up-Regulated
IGFBP2	Up-Regulated
PDPN	Up-Regulated
KLHDC8A	Up-Regulated
COL6A2	Up-Regulated
S100A10	Up-Regulated
SOD2	Up-Regulated
TAGLN	Up-Regulated
GAS1	Up-Regulated
FAM20C	Up-Regulated
C1R	Up-Regulated
HMOX1	Up-Regulated
ADM	Up-Regulated
CKS2	Up-Regulated
RAB34	Up-Regulated
SPRY1	Up-Regulated
LAMC1	Up-Regulated
EFEMP2	Up-Regulated
CAPG	Up-Regulated
FCGR3A	Up-Regulated
MYBL2	Up-Regulated
TPX2	Up-Regulated
SHC1	Up-Regulated
RHOJ	Up-Regulated
CCNB1	Up-Regulated
DMRTA2	Up-Regulated
TUBB6	Up-Regulated
VOPP1	Up-Regulated
GPX7	Up-Regulated
SLC2A10	Up-Regulated
MOXD1	Up-Regulated
TK1	Up-Regulated
ANGPT2	Up-Regulated
FOXJ1	Up-Regulated
NKX2-5	Up-Regulated
TGIF1	Up-Regulated
PLK1	Up-Regulated
RGS16	Up-Regulated
XKR8	Up-Regulated
MYO1B	Up-Regulated
MYO5C	Up-Regulated
LAMA2	Up-Regulated
SOD3	Up-Regulated
ACE	Up-Regulated
ATAD3C	Up-Regulated
RAB7B	Up-Regulated
PLAUR	Up-Regulated
CTSC	Up-Regulated
OTX1	Up-Regulated
LUM	Up-Regulated
FZD6	Up-Regulated
NDC80	Up-Regulated
PRKCDBP	Up-Regulated
SHCBP1	Up-Regulated
MSR1	Up-Regulated
FBLN7	Up-Regulated
SKA3	Up-Regulated
HOXD10	Up-Regulated
NID2	Up-Regulated
TTK	Up-Regulated
ATP5EP2	Up-Regulated
BACE2	Up-Regulated
CTF1	Up-Regulated
RMI2	Up-Regulated
ANKRD53	Up-Regulated
CCER2	Up-Regulated
C6orf15	Up-Regulated
PRICKLE3	Up-Regulated
SQRDL	Up-Regulated
ADAMTS14	Up-Regulated
MX1	Up-Regulated
THNSL2	Up-Regulated
ALPK3	Up-Regulated
ACTG2	Up-Regulated
CDC25C	Up-Regulated
CASP4	Up-Regulated
PLEK2	Up-Regulated
RSPH4A	Up-Regulated
MPZL2	Up-Regulated
C9orf171	Up-Regulated
CARD16	Up-Regulated
DEPDC1	Up-Regulated
IGF2BP3	Up-Regulated
CENPE	Up-Regulated
TEX26	Up-Regulated
PARPBP	Up-Regulated
CMYA5	Up-Regulated
MYO5B	Up-Regulated
TCTEX1D1	Up-Regulated
SLAMF8	Up-Regulated
MXRA5	Up-Regulated
EIF3CL	Up-Regulated
GGN	Up-Regulated
CDCP1	Up-Regulated
H3F3C	Up-Regulated
ADAMTS18	Up-Regulated
LGR6	Up-Regulated
EPHA1	Up-Regulated
CPNE8	Up-Regulated
C2orf50	Up-Regulated
RDH5	Up-Regulated
RSAD2	Up-Regulated
HOXB4	Up-Regulated
UBXN10	Up-Regulated
OSMR	Up-Regulated
CBLN3	Up-Regulated
WDR38	Up-Regulated
ULBP2	Up-Regulated
SLN	Up-Regulated
AC022431.2	Up-Regulated
TNFRSF10C	Up-Regulated
AL109659.1	Up-Regulated
SLC47A1	Up-Regulated
ENSG00000198064	Up-Regulated
C6orf141	Up-Regulated
CXCR2	Up-Regulated
DNAAF3	Up-Regulated
AOX1	Up-Regulated
CPA4	Up-Regulated
FCGR2B	Up-Regulated
GPR139	Up-Regulated
MMP7	Up-Regulated
ESPNL	Up-Regulated
PLA2R1	Up-Regulated
ZBED6CL	Up-Regulated
LDLRAD2	Up-Regulated
ZNF474	Up-Regulated
RFX8	Up-Regulated
LAMP3	Up-Regulated
FHAD1	Up-Regulated
HRASLS2	Up-Regulated
RNASE10	Up-Regulated
AC108938.5	Up-Regulated
DMBX1	Up-Regulated
GSX2	Up-Regulated
ACPP	Up-Regulated
S100A5	Up-Regulated
ADM2	Up-Regulated
PDZK1IP1	Up-Regulated
LRRC71	Up-Regulated
CASP5	Up-Regulated
CDC42BPG	Up-Regulated
C2orf70	Up-Regulated
GZMA	Up-Regulated
LBP	Up-Regulated
FCN1	Up-Regulated
CD3D	Up-Regulated
CHODL	Up-Regulated
HNRNPCL1	Up-Regulated
MMP13	Up-Regulated
FAM72C	Up-Regulated
GPR141	Up-Regulated
ENSG00000266728	Up-Regulated
BANK1	Up-Regulated
HOXB6	Up-Regulated
HIST1H3C	Up-Regulated
CHRND	Up-Regulated
ENSG00000258130	Up-Regulated
C8orf22	Up-Regulated
C17orf64	Up-Regulated
MACC1	Up-Regulated
CD5	Up-Regulated
PVRL4	Up-Regulated
TP63	Up-Regulated
TIMD4	Up-Regulated
PERM1	Up-Regulated
CLCNKA	Up-Regulated
LBX1	Up-Regulated
HIST2H4A	Up-Regulated
ANKUB1	Up-Regulated
HIST1H2AL	Up-Regulated
SPATA3	Up-Regulated
TTC29	Up-Regulated
DRC1	Up-Regulated
PM20D1	Up-Regulated
THEGL	Up-Regulated
SLC15A1	Up-Regulated
TRIM61	Up-Regulated
ENSG00000268223	Up-Regulated
ELF5	Up-Regulated
BARHL2	Up-Regulated
HSH2D	Up-Regulated
IL22RA1	Up-Regulated
LRRC8E	Up-Regulated
COL10A1	Up-Regulated
UBASH3A	Up-Regulated
CALCB	Up-Regulated
HMX2	Up-Regulated
ENSG00000272921	Up-Regulated
ORM1	Up-Regulated
MAB21L2	Up-Regulated
CYP2F1	Up-Regulated
LIN28B	Up-Regulated
HMX3	Up-Regulated
SCML4	Up-Regulated
TNNI1	Up-Regulated
XXbac-BPG32J3.19	Up-Regulated
OR2J2	Up-Regulated
C7orf33	Up-Regulated
RASSF9	Up-Regulated
BSND	Up-Regulated
IGF2BP1	Up-Regulated
CH507-396I9.6	Up-Regulated
ADGB	Up-Regulated
CCDC83	Up-Regulated
ATP1B4	Up-Regulated
CLRN1	Up-Regulated
KCNU1	Up-Regulated
SIM1	Up-Regulated
PIH1D3	Up-Regulated
PRAMEF1	Up-Regulated
GNGT1	Up-Regulated
GPR15	Up-Regulated
UGT3A2	Up-Regulated
OLIG3	Up-Regulated
MRGPRX4	Up-Regulated
FGF3	Up-Regulated
CXCL17	Up-Regulated
UGT2B15	Up-Regulated
C1orf68	Up-Regulated
CTAGE1	Up-Regulated
OR7E24	Up-Regulated
SPATS1	Up-Regulated
OR9A4	Up-Regulated
RP5-1052I5.2	Up-Regulated
AC006386.1	Up-Regulated
RPS4Y2	Up-Regulated
