# Supplementary material for: Alterations in the RTK/Ras/PI3K/AKT pathway serve as potential biomarkers for immunotherapy outcome of diffuse gliomas
Source: Aging (Albany NY). 2021 Jun 8;13(11):15444–58. doi: 10.18632/aging.203102 (PMC8221357; doi:10.18632/aging.203102)
Supplement: Supplementary Table 3 [file aging-13-203102-s004.xlsx]

## Sheet: Sheet1
Supplementary Table 3. Significant regulated inflammatory response gene.
GeneSymbol	regulated
CREB3L3	Down-Regulated
DUOXA2	Down-Regulated
IL9	Down-Regulated
DNASE1L3	Down-Regulated
PTGER3	Down-Regulated
TACR1	Down-Regulated
AZU1	Down-Regulated
FABP4	Down-Regulated
CCL4L1	Down-Regulated
CCL4	Down-Regulated
PSTPIP1	Down-Regulated
BMP2	Down-Regulated
IL36RN	Up-Regulated
CELA1	Up-Regulated
XCL2	Up-Regulated
IL23R	Up-Regulated
IL20	Up-Regulated
AGTR2	Up-Regulated
CXCL17	Up-Regulated
MMP3	Up-Regulated
LEP	Up-Regulated
CSRP3	Up-Regulated
XCL1	Up-Regulated
IL5RA	Up-Regulated
IFNG	Up-Regulated
IL22RA2	Up-Regulated
CD40LG	Up-Regulated
ORM1	Up-Regulated
C2CD4A	Up-Regulated
PROK2	Up-Regulated
CCL23	Up-Regulated
MMP8	Up-Regulated
IL36B	Up-Regulated
CD96	Up-Regulated
TNFSF11	Up-Regulated
BDKRB1	Up-Regulated
CD28	Up-Regulated
CCR4	Up-Regulated
CCL13	Up-Regulated
STAP1	Up-Regulated
CHST4	Up-Regulated
CXCR6	Up-Regulated
NLRP12	Up-Regulated
CXCR3	Up-Regulated
IL36G	Up-Regulated
IL10	Up-Regulated
ELF3	Up-Regulated
AGTR1	Up-Regulated
SAA4	Up-Regulated
IL15	Up-Regulated
CCL26	Up-Regulated
CD200R1	Up-Regulated
CXCL13	Up-Regulated
CCR2	Up-Regulated
GATA3	Up-Regulated
LBP	Up-Regulated
HGF	Up-Regulated
LILRA5	Up-Regulated
IL6	Up-Regulated
PROC	Up-Regulated
IL1R2	Up-Regulated
TLR8	Up-Regulated
FPR2	Up-Regulated
HP	Up-Regulated
S100A12	Up-Regulated
GBP5	Up-Regulated
CST7	Up-Regulated
IL2RA	Up-Regulated
CCL20	Up-Regulated
CXCL9	Up-Regulated
FCGR2B	Up-Regulated
CXCL6	Up-Regulated
BDKRB2	Up-Regulated
IL1RN	Up-Regulated
CCL5	Up-Regulated
TSPAN2	Up-Regulated
CXCR2	Up-Regulated
PTGIR	Up-Regulated
OSM	Up-Regulated
GAL	Up-Regulated
CCR5	Up-Regulated
CD36	Up-Regulated
SAA2	Up-Regulated
OSMR	Up-Regulated
TREM1	Up-Regulated
BIRC3	Up-Regulated
HAMP	Up-Regulated
SLAMF8	Up-Regulated
NFKBIZ	Up-Regulated
CXCL11	Up-Regulated
CASP4	Up-Regulated
HFE	Up-Regulated
NOX4	Up-Regulated
BACE2	Up-Regulated
LYZ	Up-Regulated
LY96	Up-Regulated
SLC11A1	Up-Regulated
CTSC	Up-Regulated
S100A8	Up-Regulated
LXN	Up-Regulated
SERPINA3	Up-Regulated
SDC1	Up-Regulated
CXCL10	Up-Regulated
GSDMD	Up-Regulated
ICAM1	Up-Regulated
ITGA2	Up-Regulated
RARRES2	Up-Regulated
SERPINA1	Up-Regulated
C5AR1	Up-Regulated
HSPG2	Up-Regulated
EPHA2	Up-Regulated
PLA2G2A	Up-Regulated
PBK	Up-Regulated
CXCL8	Up-Regulated
PLSCR1	Up-Regulated
HRH1	Up-Regulated
WISP1	Up-Regulated
TNFAIP6	Up-Regulated
MMP9	Up-Regulated
THBS1	Up-Regulated
CD163	Up-Regulated
PTX3	Up-Regulated
SAA1	Up-Regulated
NOS2	Up-Regulated
CD97	Up-Regulated
CNR1	Up-Regulated
IL1RAP	Up-Regulated
S100A9	Up-Regulated
SOCS3	Up-Regulated
CHST2	Up-Regulated
MDK	Up-Regulated
NAMPT	Up-Regulated
PTGS1	Up-Regulated
ADM	Up-Regulated
TNFRSF1A	Up-Regulated
HMOX1	Up-Regulated
CD44	Up-Regulated
SERPINE1	Up-Regulated
F3	Up-Regulated
ANXA1	Up-Regulated
FN1	Up-Regulated
TIMP1	Up-Regulated
ZYX	Up-Regulated
EGFR	Up-Regulated
SPP1	Up-Regulated
CHI3L1	Up-Regulated
TMSB4X	Up-Regulated
